# Supplementary material
Source: PubMed Central journal article supplement (PMC4169037)
Supplement: mabs-5-445-s01.pdf [file mabs-5-445-s01.pdf]

## **Supplemental Material to:**

**Thomas Tiller, Ingrid Schuster, Dorothee Deppe, Katja Siegers, Ralf Strohner, Tanja Herrmann, Marion Berenguer, Dominique Poujol, Jennifer Stehle, Yvonne Stark, Martin Heßling, Daniela Daubert, Karin Felderer, Stefan Kaden, Johanna Kölln, Markus Enzelberger and Stefanie Urlinger**

**A fully synthetic human Fab antibody library based on fixed VH/VL framework pairings with favorable biophysical properties**

**2013; 5(3)**

**<http://dx.doi.org/10.4161/mabs.24218>**

**<http://www.landesbioscience.com/journals/mabs/article/24218/>**

## Supplementary Figure S1 to Tiller *et al.*

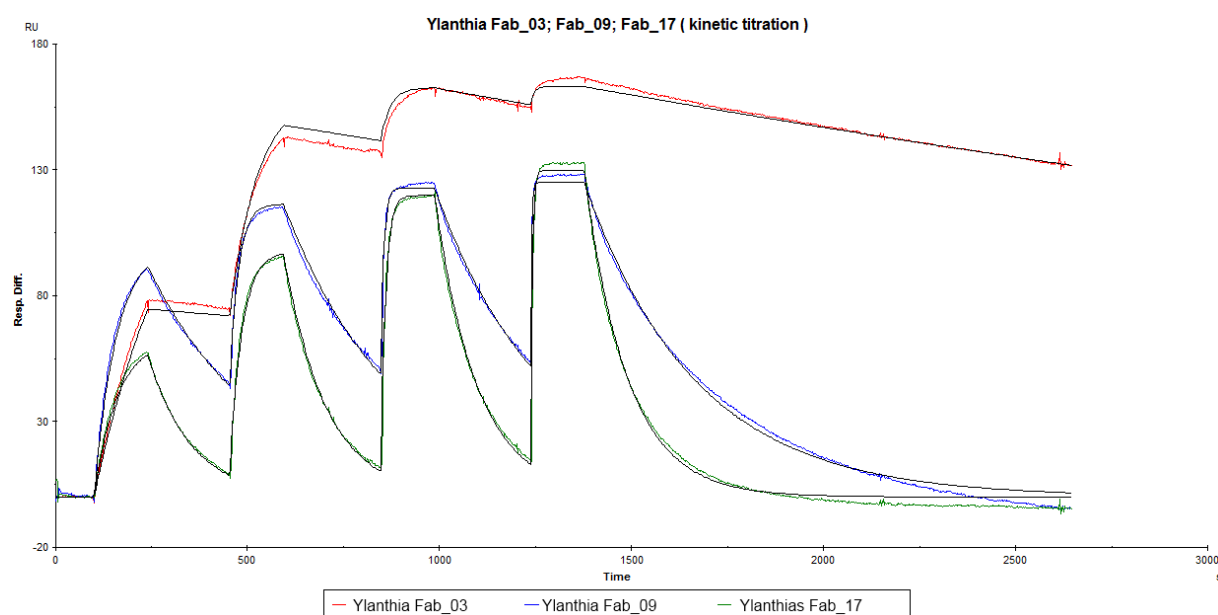

**Figure S1.** Sample sensorgrams (including applied fits) for three representative kinetic titration experiments.

Kinetic experiments to determine rate constants  $k_{on}$  and  $k_{off}$  were performed on a Biacore 3000 instrument (GE Healthcare, Uppsala, Sweden), according to the “kinetic titration” method published by Karlsson *et al.*<sup>1</sup>

Basically, protein antigen was immobilized on a Biacore CM5 sensor chip using standard EDC/NHS chemistry (immobilization level 190 RU). PBS containing 0.05% (v/v) Tween-20 was used as running buffer, with a flow of 30  $\mu$ L/min applied throughout the experiment.

Monomeric Fab fragments (monomer content >90% as determined by HP-SEC) were used as samples. Each of these samples was injected in a 3<sup>n</sup> concentration series (19 nM, 56 nM, 167 nM, 500 nM), for association phases of 140 s, intermittent dissociation phases of 215 s, and a final dissociation phase of 1200 s (20 min). A blank injection of running buffer following the same injection pattern was recorded and subtracted from each sensorgram. After each measurement, bound Fab was regenerated from the sensor surface by a 14 s injection of 10 mM Glycine / HCl pH 2.0.

The obtained sensorgrams were fitted according to a bimolecular (1:1) binding kinetics, using the method and model described by Karlsson *et al.*<sup>1</sup>

### References

1. Karlsson R, Katsamba PS, Nordin H, Pol E, Myszka DG. Analyzing a kinetic titration series using affinity biosensors. *Anal Biochem* 2006; 349:136-47; PMID:16337141; <http://dx.doi.org/10.1016/j.ab.2005.09.034>.

## Supplementary Table S1 to Tiller *et al.*

**Table S1.** Rate constants and affinities of 24 selected Ylanthia Fab molecules.

Monovalent affinities of 24 selected Ylanthia Fab molecules as determined by surface plasmon resonance (SPR) measurements against a protein target. In the analyzed subset,  $k_{on}$  values ranged between  $2.9E+04$  and  $4.6E+06$  [1/Ms] and  $k_{off}$  values between  $8.1E-05$  and  $1.7E-01$  [1/s].

# sensorgrams and applied fits presented in Figure S1

\*slight deviation from bimolecular binding model / 1:1 binding

| Sample              | $k_{on}$<br>[1/Ms] | $k_{off}$<br>[1/s] | $K_D$<br>[nM] |
|---------------------|--------------------|--------------------|---------------|
| Fab_01              | 3.7E+05            | 1.1E-03            | 2.9           |
| Fab_02              | 4.6E+06            | 1.4E-01            | 31            |
| Fab_03 <sup>#</sup> | 2.4E+05            | 1.7E-04            | 0.7           |
| Fab_04 <sup>*</sup> | 3.6E+05            | 3.2E-04            | 0.9           |
| Fab_05              | 3.6E+05            | 1.1E-02            | 30            |
| Fab_06              | 2.7E+05            | 6.4E-03            | 24            |
| Fab_07              | 7.2E+05            | 1.3E-02            | 18            |
| Fab_08              | 1.5E+05            | 1.1E-03            | 7.2           |
| Fab_09 <sup>#</sup> | 7.9E+05            | 3.6E-03            | 4.6           |
| Fab_10              | 9.6E+05            | 5.4E-03            | 5.6           |
| Fab_11              | 1.5E+06            | 1.5E-01            | 96            |
| Fab_12              | 1.1E+06            | 1.7E-02            | 16            |
| Fab_13              | 5.8E+05            | 1.2E-02            | 20            |
| Fab_14              | 4.1E+05            | 8.6E-03            | 21            |
| Fab_15              | 7.1E+05            | 2.0E-02            | 29            |
| Fab_16              | 5.9E+05            | 1.3E-03            | 2.2           |
| Fab_17 <sup>#</sup> | 4.7E+05            | 1.0E-02            | 21            |
| Fab_18              | 7.6E+05            | 3.5E-02            | 46            |
| Fab_19              | 7.8E+05            | 3.2E-02            | 41            |
| Fab_20              | 9.4E+05            | 1.7E-01            | 190           |
| Fab_21              | 2.9E+04            | 8.1E-05            | 2.8           |
| Fab_22 <sup>*</sup> | 2.1E+06            | 7.3E-02            | 35            |
| Fab_23              | 3.9E+05            | 1.4E-02            | 37            |
| Fab_24              | 7.0E+05            | 4.0E-02            | 57            |
